# Supplementary material for: Transitional Strategies of Juvenile Green Sturgeon from a Riverine to a Brackish Water Environment
Source: Hindawi journal article supplement (doi:10.1155/2024/6637511), 2024-02-20
Supplement: f1 [file 6637511.f1.pdf]

## Supplementary Material

### Transitional Strategies of Juvenile Green Sturgeon from a Riverine to a Brackish Water Environment

William R. Poytress, Leo C. Polansky, Joshua J. Gruber

**Figure S1:** Plots showing individual juvenile green sturgeon detection events spanning the time within the upper reach of the Sacramento River to the first event out of the upper reach. Tag codes with capture type (in parentheses) are used as plot headings. Start times are 7 days prior to the release event (grey x). Event duration is shown by a horizontal line with open and filled circles indicating the start and end times, respectively. The dashed line is at the downstream upper reach boundary location at rkm 390 on the left y-axis. Sacramento River flow from the Vina gauging station (VIN) is shown by the grey line in cubic meters per second ( $\text{m}^3 \cdot \text{s}^{-1}$ ) on the right y-axis. Dates relative to each tagged sturgeon in months on the x-axis.

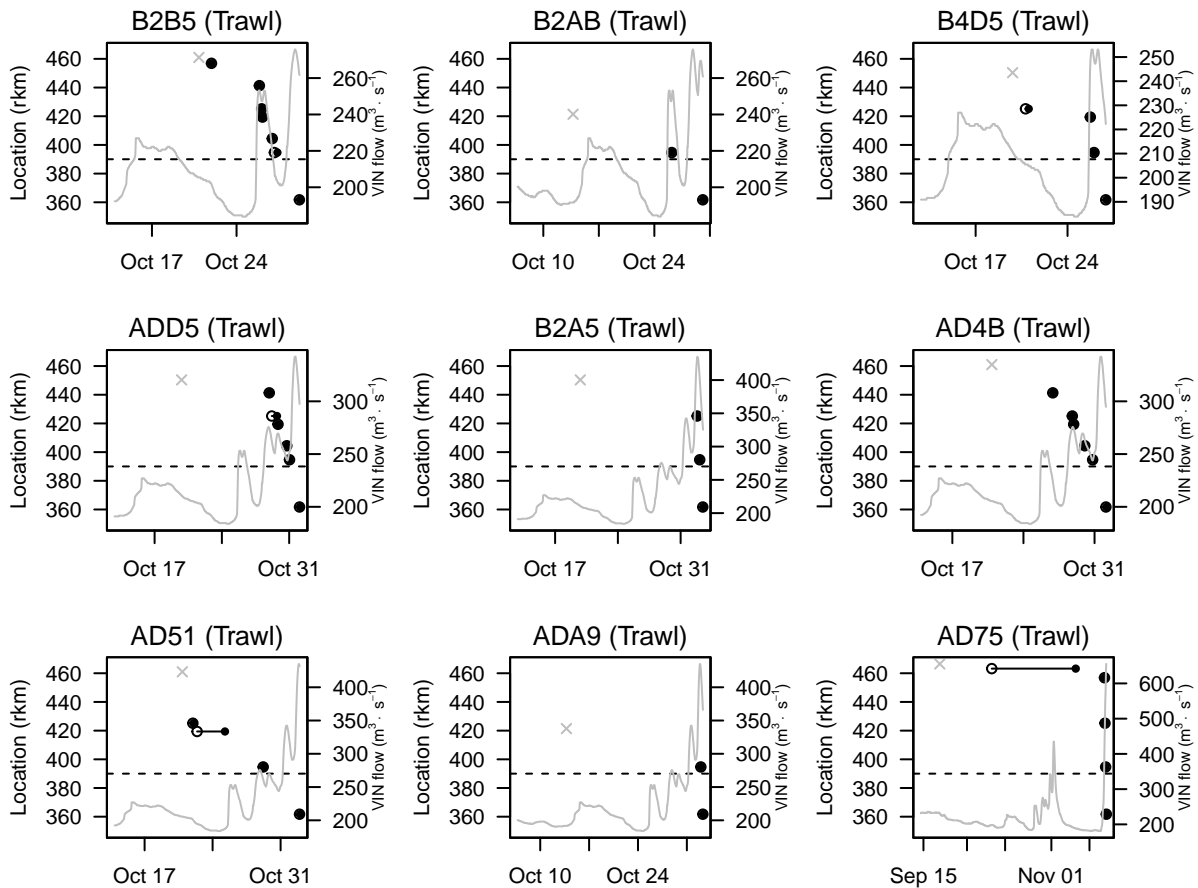

Figure S1

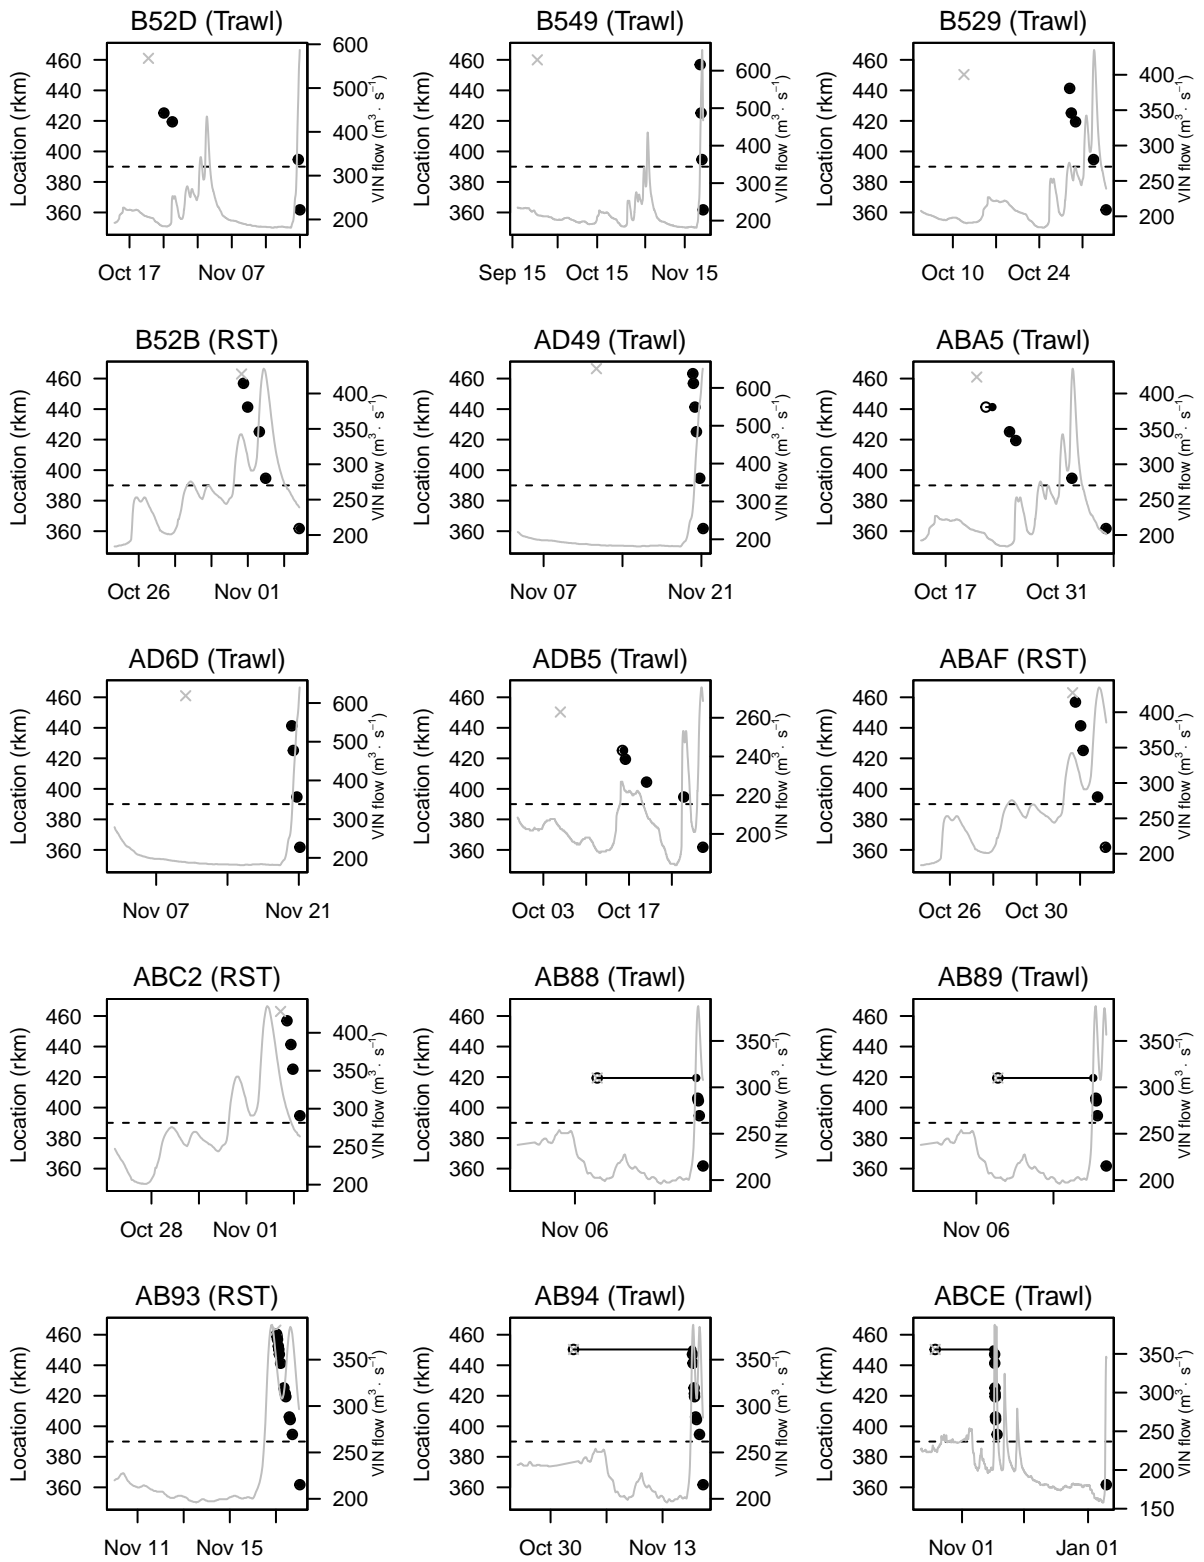

Figure S1 (continued)

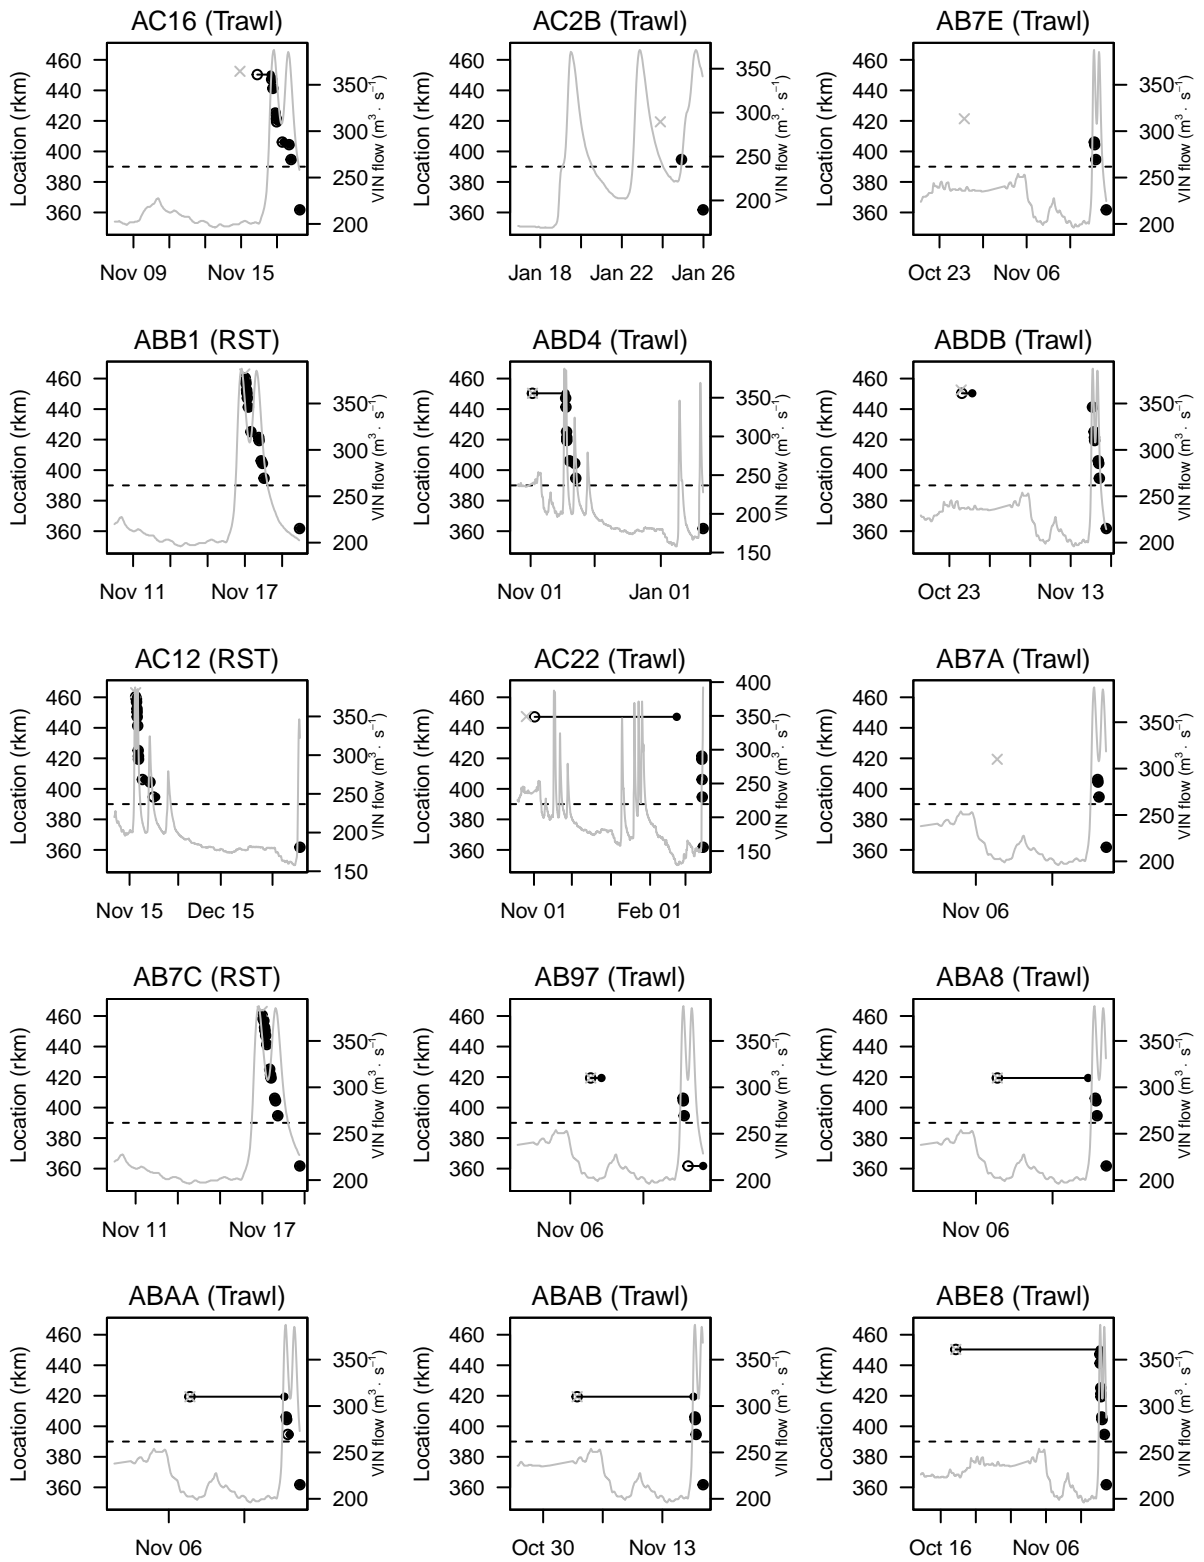

Figure S1 (continued)

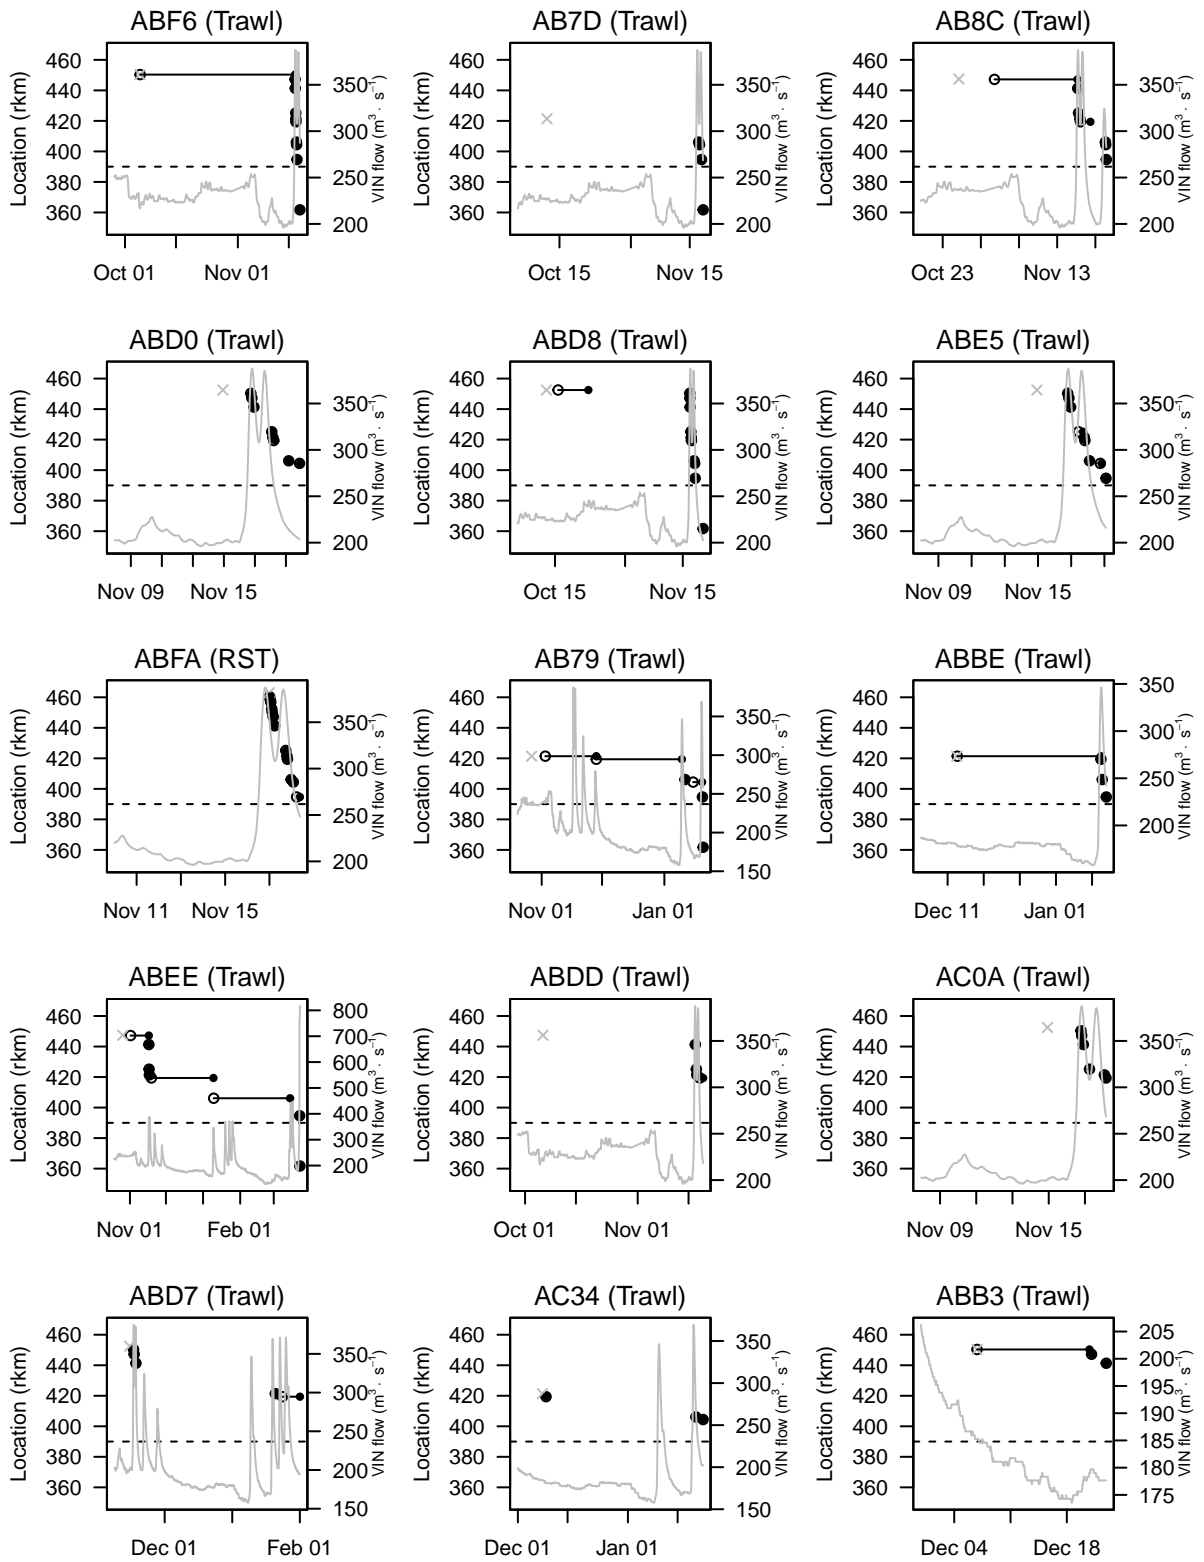

Figure S1 (continued)

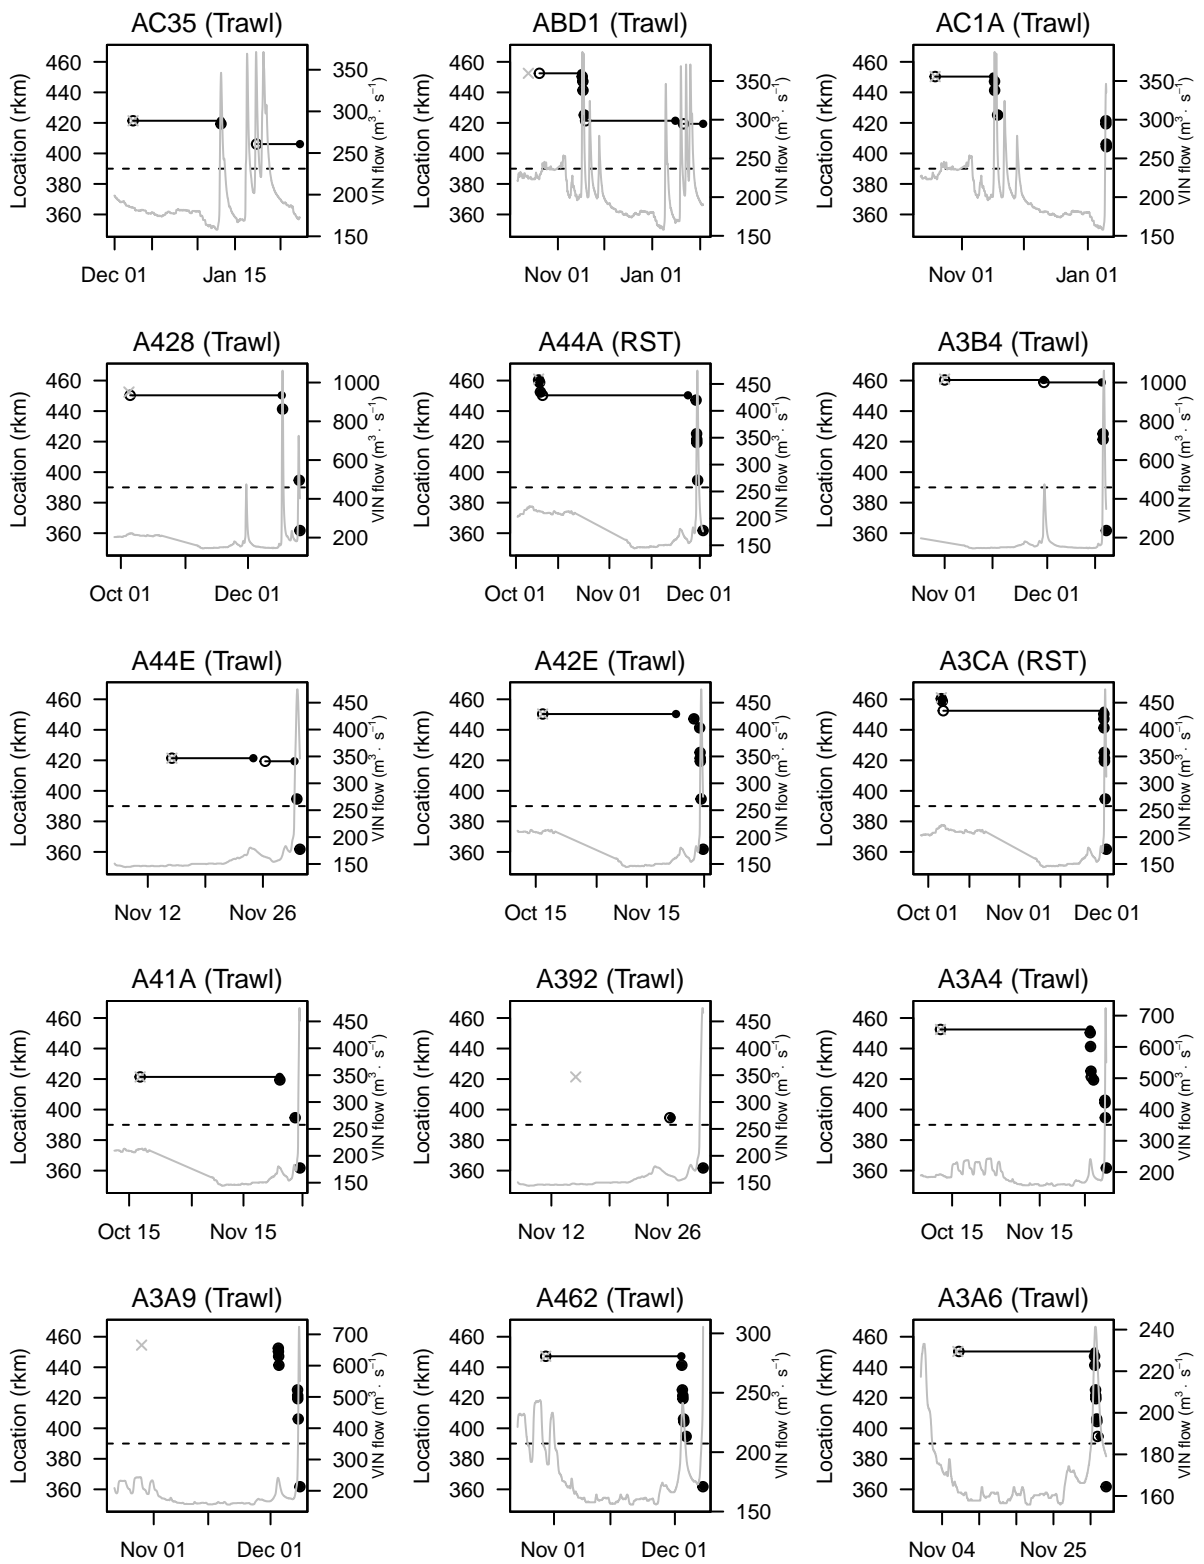

Figure S1 (continued)

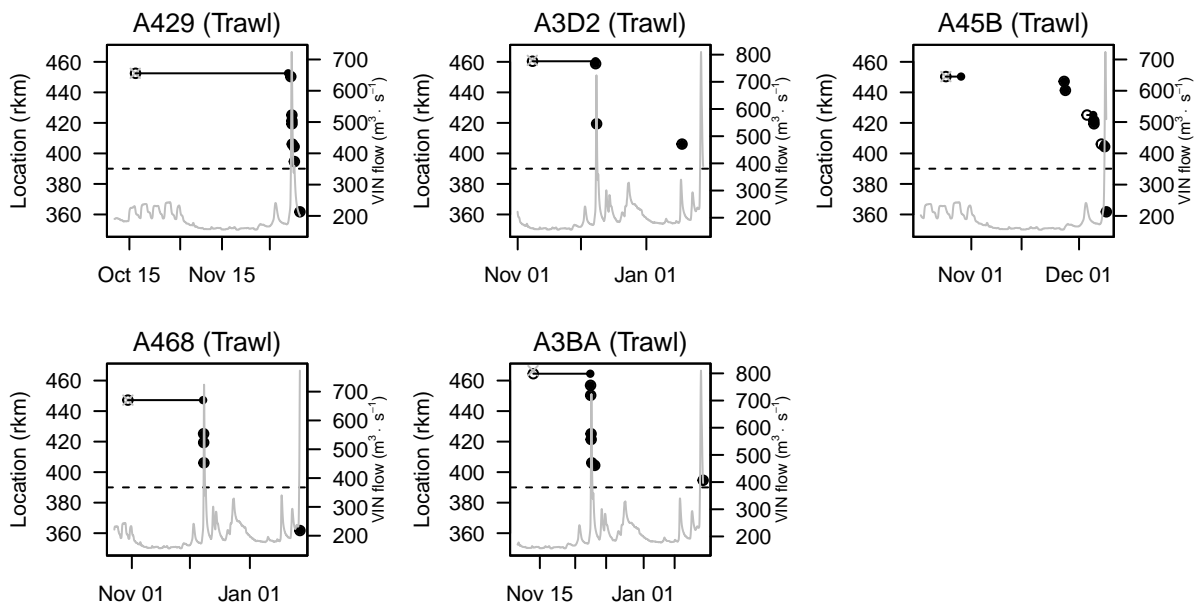

Figure S1 (continued)
